# Supplementary material
Source: Springer Nature journal article supplement (https://www.springermedizin.de/resource/supplementary/12876_2009_444_MOESM4_ESM.pdf/9437026)

Index value

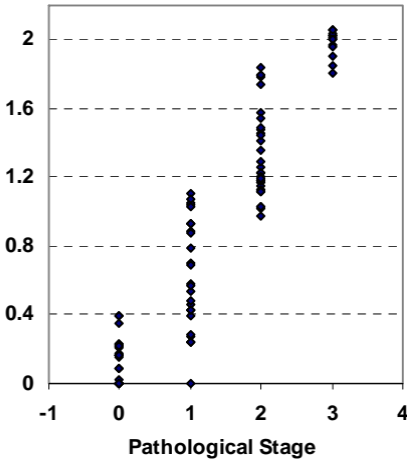

Supplement: MOESM4 [file 9437026]
